# Supplementary material
Source: publisher figshare collection journal article supplement (https://acs.figshare.com/ndownloader/files/4482451)
Supplement: Supplementary file 1 [file 4482451]

**Supporting Information to “Incorporation of Carbon Nanotubes  
into lyotropic liquid crystal by phase separation in the presence of  
hydrophilic polymer”**

by Xia Xin, Hongguang Li, Stefan A. Wieczorek, Tomasz Szymborski, Ewelina Kalwarczyk,  
Natalia Ziębach, Ewa Gorecka, Damian Pociecha, and Robert Holyst

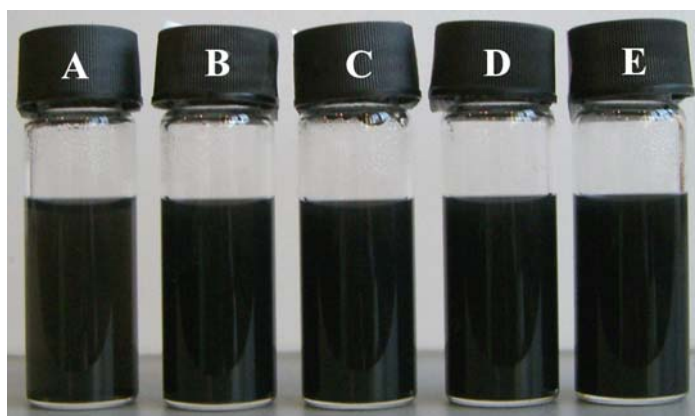

**Figure S1.** Dispersions of MWNTs in 3 mL of 0.1 wt %  $C_{12}E_6$  aqueous solutions with increasing amount of added MWNTs. The weight percents of MWNTs in the preformed dispersions are 0.01 wt% (A), 0.03 wt% (B), 0.05 wt% (C), 0.06 wt% (D), 0.1 wt% (E). The images were taken more than two weeks after preparation.

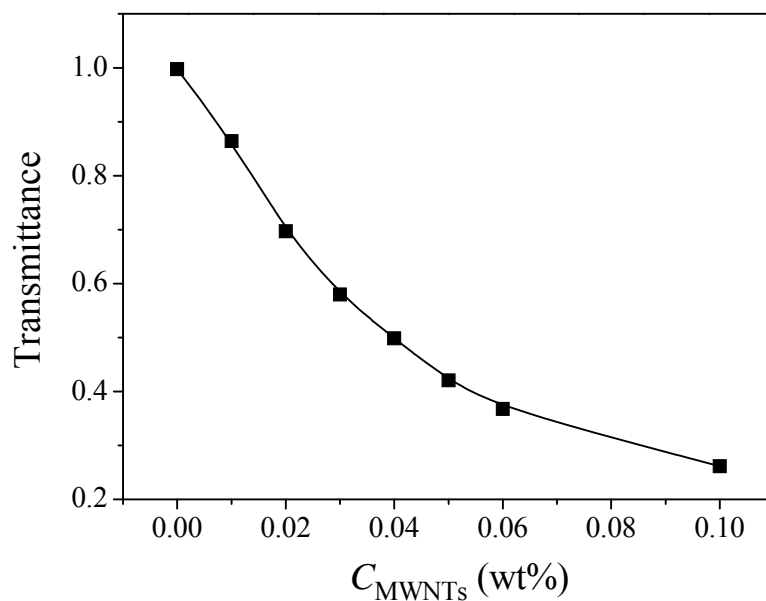

**Figure S2.** Transmittance of preformed MWNTs dispersion in 0.1 wt %  $\text{C}_{12}\text{E}_6$  aqueous solution. Measured at a wavelength of 500 nm.

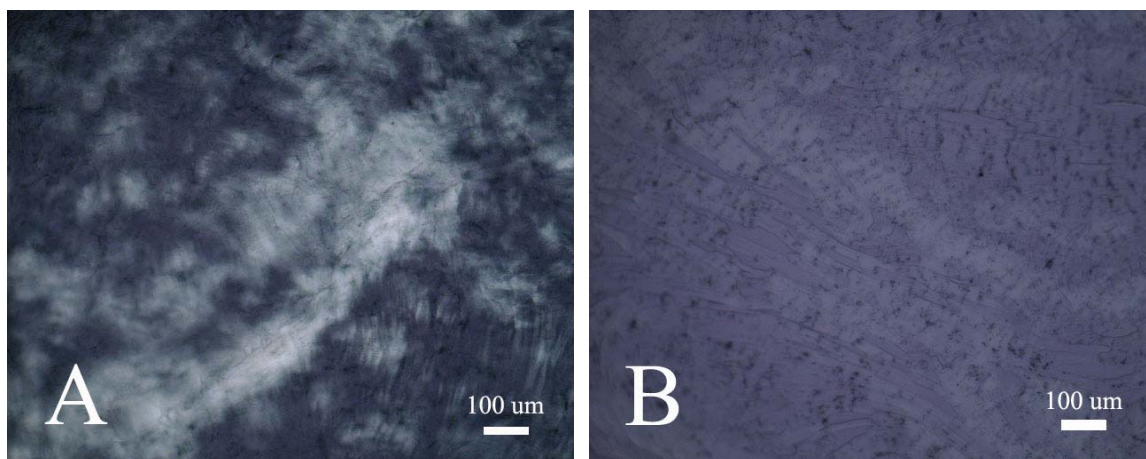

**Figure S3.** Textures of the upper  $\text{C}_{12}\text{E}_6$  hexagonal phases with incorporated MWNTs. The weight fractions of  $\text{C}_{12}\text{E}_6$  and PEG to water before phase separation are 10wt% and 20wt%, respectively. The concentrations of incorporated MWNTs in the upper LLC phases are 0.05wt% (A) and 0.25 wt % (B), respectively.
